# Supplementary material for: Antibacterial Effect of Topically Administered Tranexamic Acid in Large Joint Arthroplasty
Source: MDPI journal article supplement (doi:10.3390/app13169050), 2023-08-08
Supplement: s1 [file s1]

## Supplementary Materials

### *Staphylococcus aureus* ATCC 25923

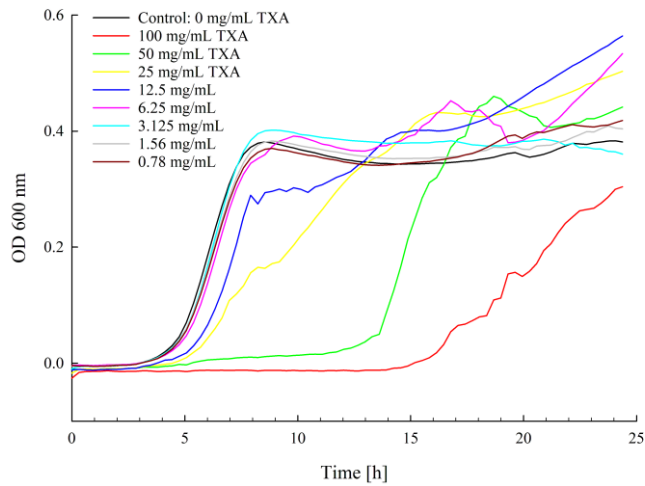

**Figure S1.** Growth curves of *S. aureus* ATCC 25923 exposed to different (0.78 - 100 mg/mL) TXA concentrations for 24 h. Positive growth control: bacterial suspensions without TXA. Presented data were normalized to blank controls. Shown data represents the mean of three measurements; SDs were all less than 5%.

### *Staphylococcus aureus* ATCC 29213

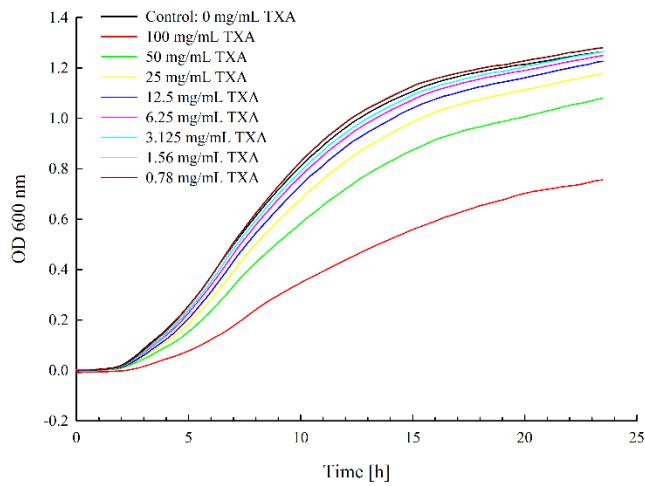

**Figure S2.** Growth curves of *S. aureus* ATCC 29213 exposed to different (0.78 - 100 mg/mL) TXA concentrations for 24 h. Positive growth control: bacterial suspensions without TXA. Presented data were normalized to blank controls. Shown data represents the mean of three measurements; SDs were all less than 5%.

*Staphylococcus aureus* ATCC 700698

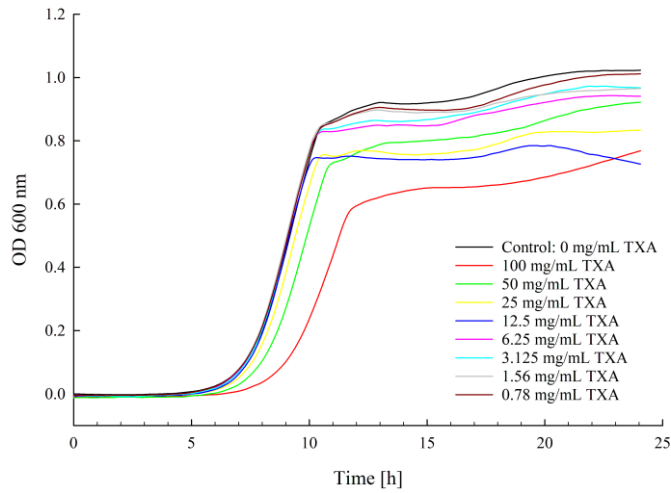

**Figure S3.** Growth curves of *S. aureus* ATCC 700698 exposed to different (0.78 - 100 mg/mL) TXA concentrations for 24 h. Positive growth control: bacterial suspensions without TXA. Presented data were normalized to blank controls. Shown data represents the mean of three measurements; SDs were all less than 5%.

*Staphylococcus aureus* ATCC 700699

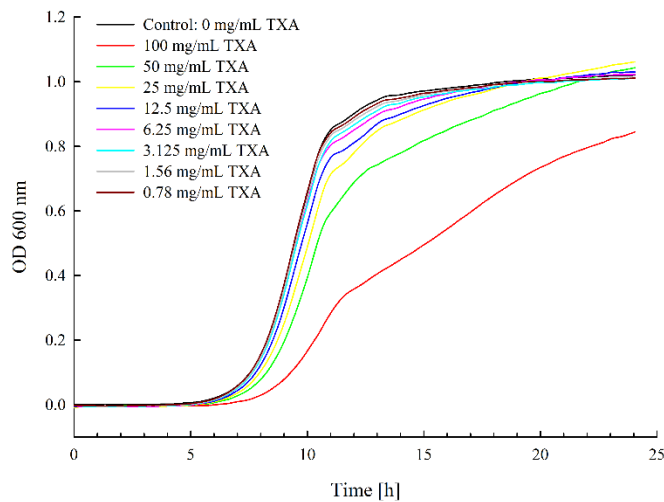

**Figure S4.** Growth curves of *S. aureus* ATCC 700699 exposed to different (0.78 - 100 mg/mL) TXA concentrations for 24 h. Positive growth control: bacterial suspensions without TXA. Presented data were normalized to blank controls. Shown data represents the mean of three measurements; SDs were all less than 5%.

*Staphylococcus aureus* OBV 17/104

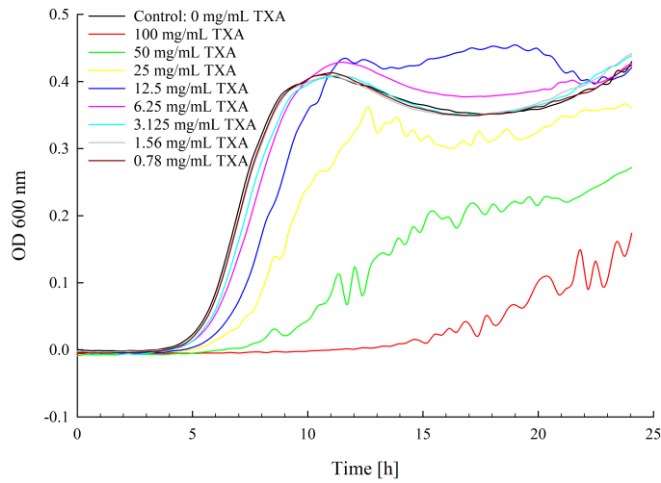

**Figure S5.** Growth curves of *S. aureus* OBV 17/104 exposed to different (0.78 - 100 mg/mL) TXA concentrations for 24 h. Positive growth control: bacterial suspensions without TXA. Presented data were normalized to blank controls. Shown data represents the mean of three measurements; SDs were all less than 5%.

*Staphylococcus aureus* ATCC 43300

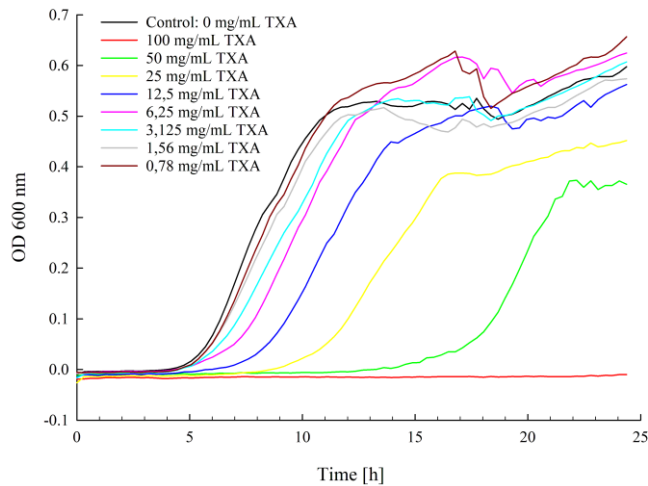

**Figure S6.** Growth curves of *S. aureus* ATCC 43300 exposed to different (0.78 - 100 mg/mL) TXA concentrations for 24 h. Positive growth control: bacterial suspensions without TXA. Presented data were normalized to blank controls. Shown data represents the mean of three measurements; SDs were all less than 5%.

*Staphylococcus epidermidis* DSM 28319

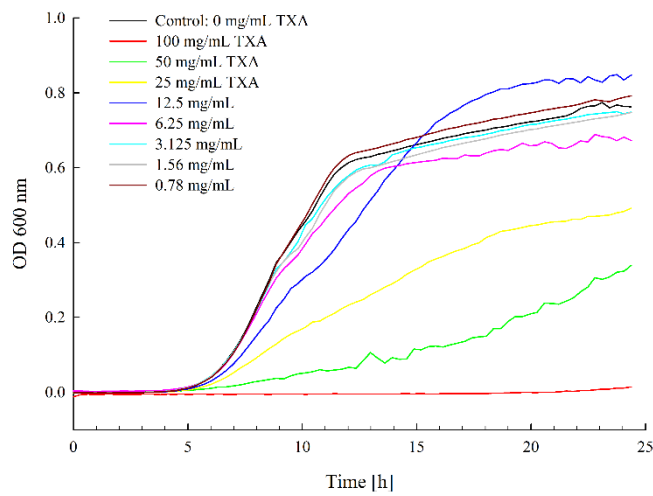

**Figure S7.** Growth curves of *S. epidermidis* DSM 28319 exposed to different (0.78 - 100 mg/mL) TXA concentrations for 24 h. Positive growth control: bacterial suspensions without TXA. Presented data were normalized to blank controls. Shown data represents the mean of three measurements; SDs were all less than 5%.

*Staphylococcus epidermidis* DSM 3269

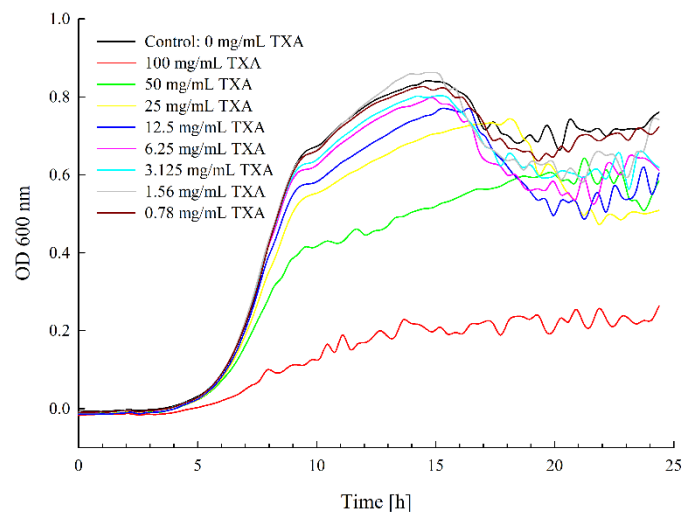

**Figure S8.** Growth curves of *S. epidermidis* DSM 3269 exposed to different (0.78 - 100 mg/mL) TXA concentrations for 24 h. Positive growth control: bacterial suspensions without TXA. Presented data were normalized to blank controls. Shown data represents the mean of three measurements; SDs were all less than 5%.

*Staphylococcus epidermidis* ATCC 12228

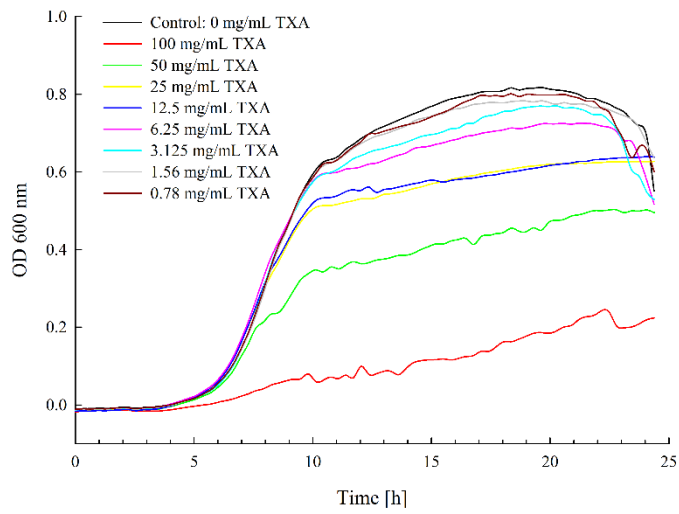

**Figure S9.** Growth curves of *S. epidermidis* ATCC 12228 exposed to different (0.78 - 100 mg/mL) TXA concentrations for 24 h. Positive growth control: bacterial suspensions without TXA. Presented data were normalized to blank controls. Shown data represents the mean of three measurements; SDs were all less than 5%.

*Staphylococcus epidermidis* OBV 14/175-2

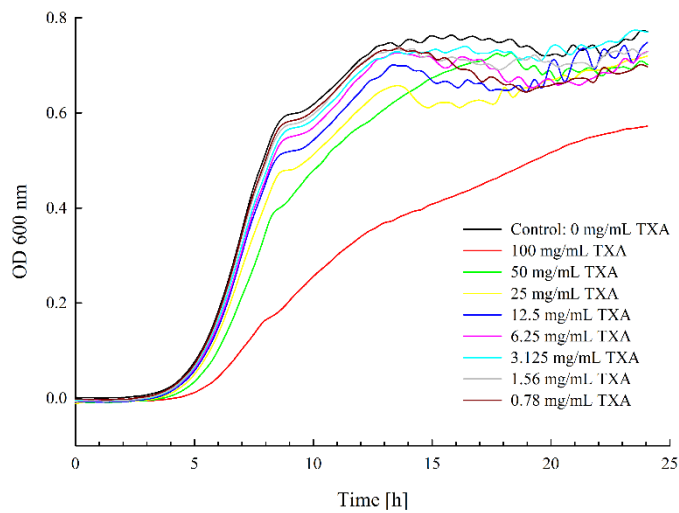

**Figure S10.** Growth curves of *S. epidermidis* OBV 14/175-2 exposed to different (0.78 - 100 mg/mL) TXA concentrations for 24 h. Positive growth control: bacterial suspensions without TXA. Presented data were normalized to blank controls. Shown data represents the mean of three measurements; SDs were all less than 5%.

*Staphylococcus epidermidis* OBV 14/175-3

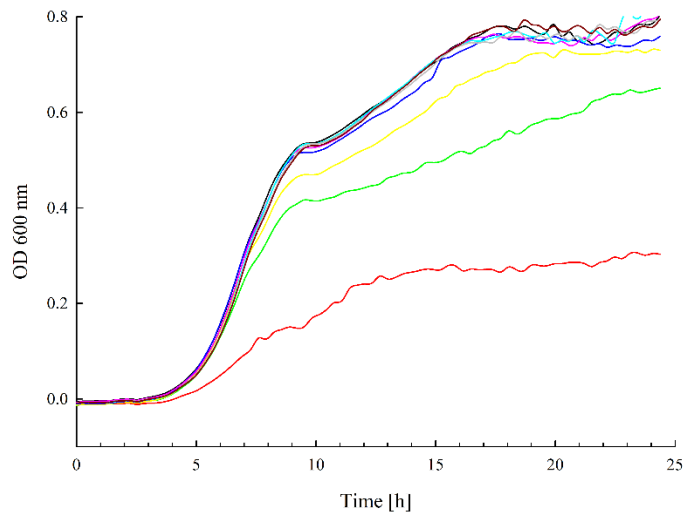

**Figure S11.** Growth curves of *S. epidermidis* OBV 14/175-3 exposed to different (0.78 - 100 mg/mL) TXA concentrations for 24 h. Positive growth control: bacterial suspensions without TXA. Presented data were normalized to blank controls. Shown data represents the mean of three measurements; SDs were all less than 5%.

*Staphylococcus epidermidis* OBV 12/122

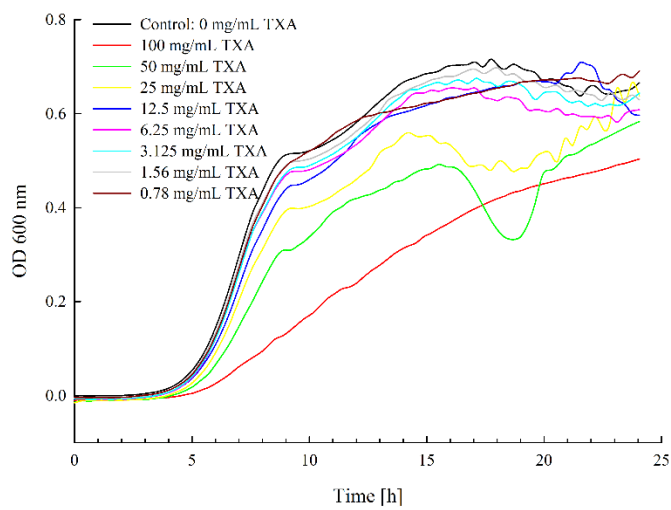

**Figure S12.** Growth curves of *S. epidermidis* OBV 12/122 exposed to different (0.78 - 100 mg/mL) TXA concentrations for 24 h. Positive growth control: bacterial suspensions without TXA. Presented data were normalized to blank controls. Shown data represents the mean of three measurements; SDs were all less than 5%.

*Staphylococcus lugdunensis* OBV 20/143

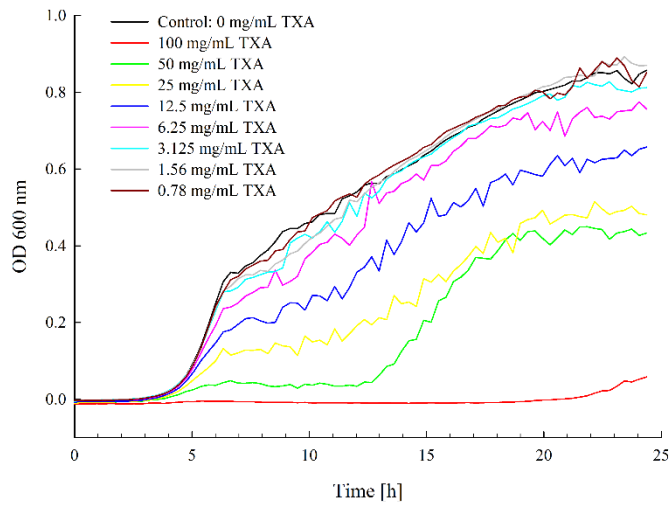

**Figure S13.** Growth curves of *S. lugdunensis* OBV 20/143 exposed to different (0.78 - 100 mg/mL) TXA concentrations for 24 h. Positive growth control: bacterial suspensions without TXA. Presented data were normalized to blank controls. Shown data represents the mean of three measurements; SDs were all less than 5%.

*Pseudomonas aeruginosa* DSM 21385

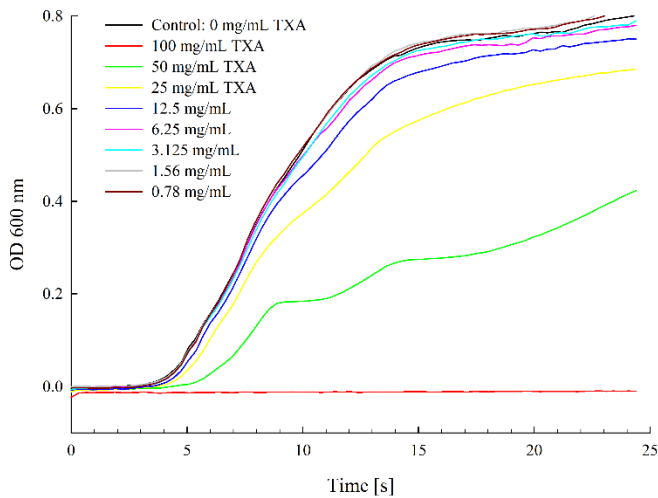

**Figure S14.** Growth curves of *P. aeruginosa* DSM 21385 exposed to different (0.78 - 100 mg/mL) TXA concentrations for 24 h. Positive growth control: bacterial suspensions without TXA. Presented data were normalized to blank controls. Shown data represents the mean of three measurements; SDs were all less than 5%.

*Pseudomonas aeruginosa* OBV 19/662

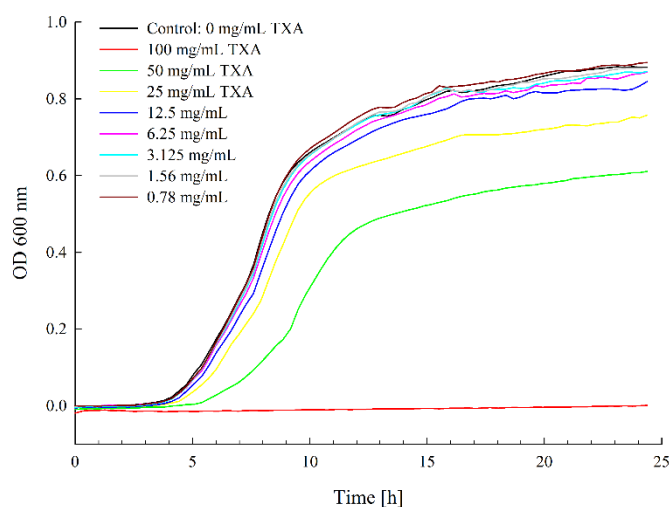

**Figure S15.** Growth curves of *P.aeruginosa* OBV 19/662 exposed to different (0.78 - 100 mg/mL) TXA concentrations for 24 h. Positive growth control: bacterial suspensions without TXA. Presented data were normalized to blank controls. Shown data represents the mean of three measurements; SDs were all less than 5%.

*Enterococcus faecalis* ATCC 29212

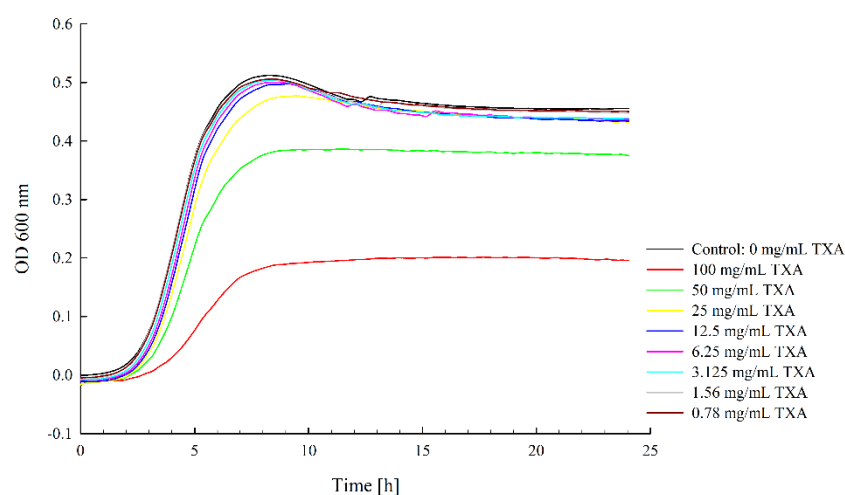

**Figure S16.** Growth curves of *E. faecalis* ATCC 29212 exposed to different (0.78 - 100 mg/mL) TXA concentrations for 24 h. Positive growth control: bacterial suspensions without TXA. Presented data were normalized to blank controls. Shown data represents the mean of three measurements; SDs were all less than 5%.

*Enterococcus faecalis* OBV 11/850

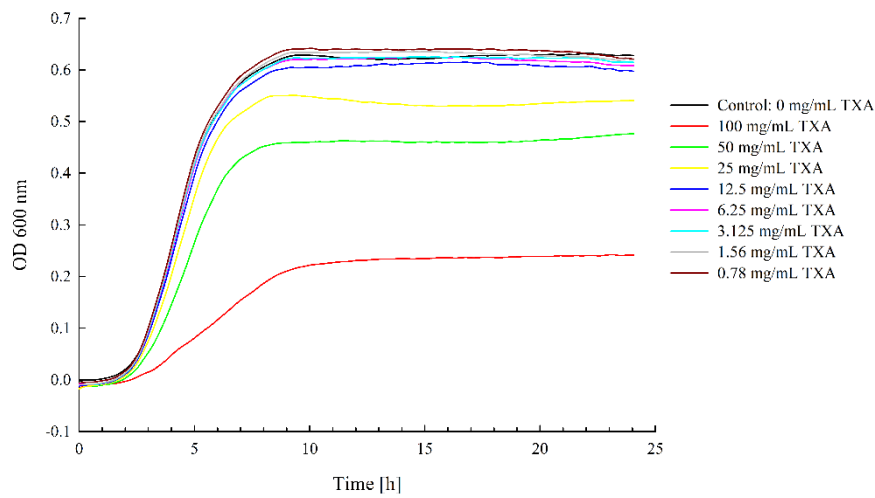

**Figure S17.** Growth curves of *E. faecalis* OBV 11/850 exposed to different (0.78 - 100 mg/mL) TXA concentrations for 24 h. Positive growth control: bacterial suspensions without TXA. Presented data were normalized to blank controls. Shown data represents the mean of three measurements; SDs were all less than 5%.

*Enterococcus faecium* OBV 11/549-b

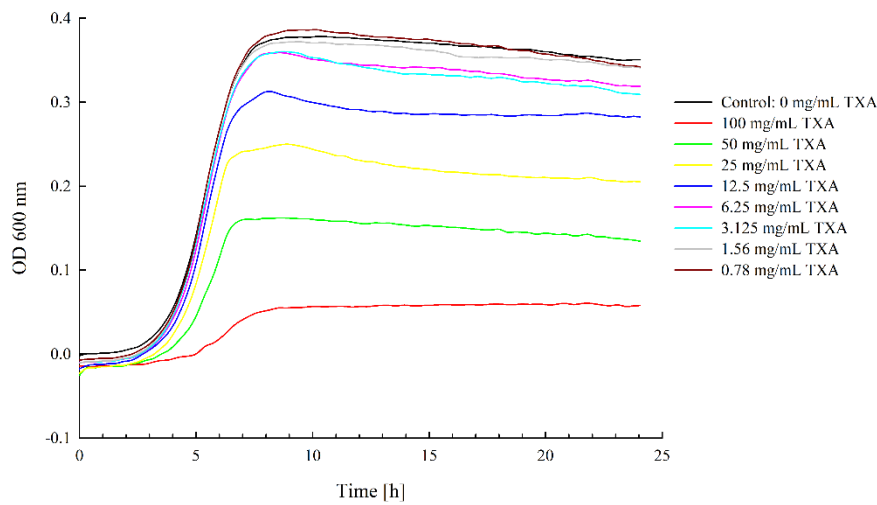

**Figure S18.** Growth curves of *E. faecium* ATCC 11/549-b exposed to different (0.78 - 100 mg/mL) TXA concentrations for 24 h. Positive growth control: bacterial suspensions without TXA. Presented data were normalized to blank controls. Shown data represents the mean of three measurements; SDs were all less than 5%.

*Escherichia coli* ATCC 25922

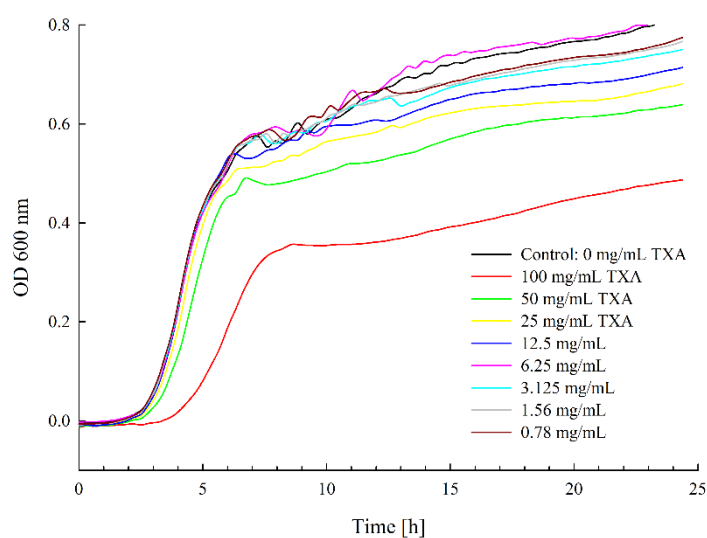

**Figure S19.** Growth curves of *E. coli* ATCC 25922 exposed to different (0.78 - 100 mg/mL) TXA concentrations for 24 h. Positive growth control: bacterial suspensions without TXA. Presented data were normalized to blank controls. Shown data represents the mean of three measurements; SDs were all less than 5%.

*Escherichia coli* DSM 613

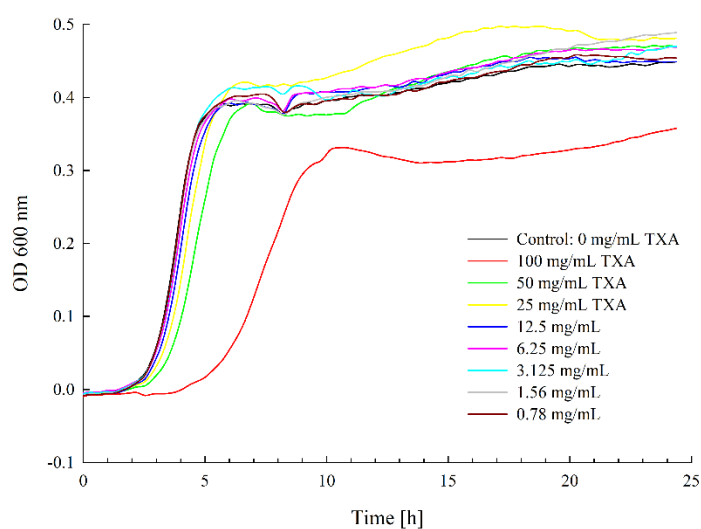

**Figure S20.** Growth curves of *E. coli* DSM 613 exposed to different (0.78 - 100 mg/mL) TXA concentrations for 24 h. Positive growth control: bacterial suspensions without TXA. Presented data were normalized to blank controls. Shown data represents the mean of three measurements; SDs were all less than 5%.

*Escherichia coli* OBV 14/112

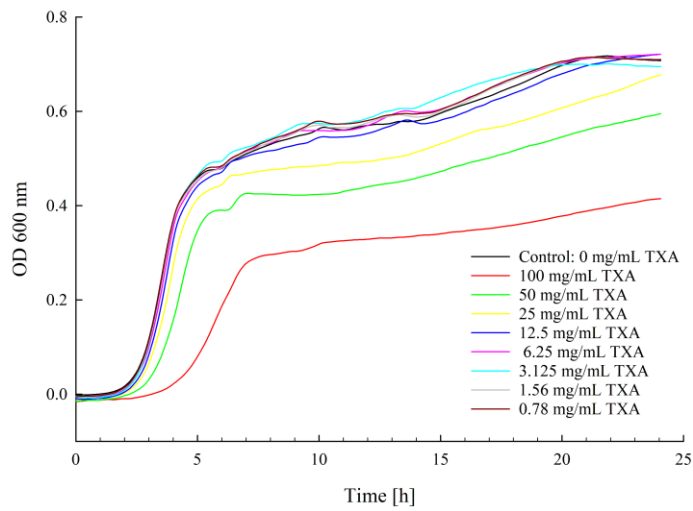

**Figure S21.** Growth curves of *E. coli* OBV 14/112 exposed to different (0.78 - 100 mg/mL) TXA concentrations for 24 h. Positive growth control: bacterial suspensions without TXA. Presented data were normalized to blank controls. Shown data represents the mean of three measurements; SDs were all less than 5%.

*Escherichia coli* OBV 12/344

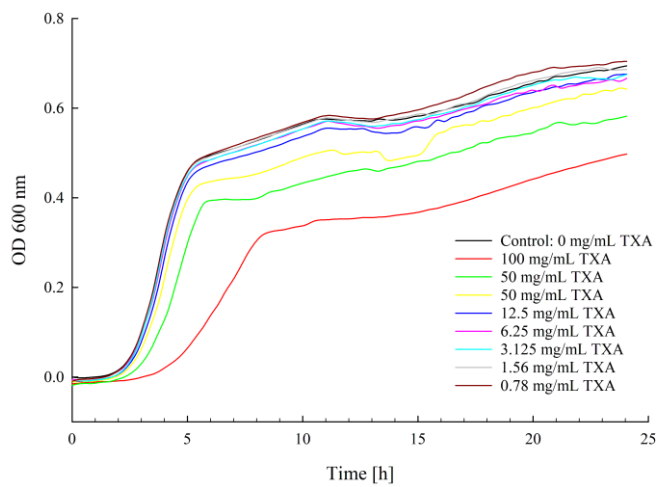

**Figure S22.** Growth curves of *E. coli* OBV 12/344 exposed to different (0.78 - 100 mg/mL) TXA concentrations for 24 h. Positive growth control: bacterial suspensions without TXA. Presented data were normalized to blank controls. Shown data represents the mean of three measurements; SDs were all less than 5%.

**Table S1.** The maximum specific growth rate ( $\mu$ ) and lag time ( $\lambda$ ) of bacterial strains at different TXA concentrations.

|                                       | 0                           |                  | 100                         |                  | 50                          |                  | 25                          |                  | 12.5                        |                  | 6.25                        |                  | 3.125                       |                  | 1,56                        |                  | 0,78                        |                  |
|---------------------------------------|-----------------------------|------------------|-----------------------------|------------------|-----------------------------|------------------|-----------------------------|------------------|-----------------------------|------------------|-----------------------------|------------------|-----------------------------|------------------|-----------------------------|------------------|-----------------------------|------------------|
|                                       | [mg/mL]                     |                  | [mg/mL]                     |                  | [mg/mL]                     |                  | [mg/mL]                     |                  | [mg/mL]                     |                  | [mg/mL]                     |                  | [mg/mL]                     |                  | [mg/mL]                     |                  | [mg/mL]                     |                  |
|                                       | $\mu$<br>[h <sup>-1</sup> ] | $\lambda$<br>[h] |
| <i>S. aureus</i><br>ATCC 25923        | 0.169                       | 4.781            | 0.043                       | 16.203           | 0.133                       | 13.274           | 0.047                       | 5.257            | 0.044                       | 3.667            | 0.114                       | 4.698            | 0.175                       | 4.946            | 0.158                       | 4.885            | 0.144                       | 4.824            |
| <i>S. aureus</i><br>ATCC 29213        | 0.118                       | 2.88             | 0.055                       | 3.945            | 0.088                       | 3.37             | 0.102                       | 3.264            | 0.110                       | 3.182            | 0.114                       | 3.057            | 0.117                       | 3.011            | 0.124                       | 3.031            | 0.122                       | 2.962            |
| <i>S. aureus</i><br>ATCC 43300        | 0.118                       | 5.572            | 0.000                       | -                | 0.089                       | 17.216           | 0.072                       | 10.590           | 0.090                       | 8.259            | 0.105                       | 7.042            | 0.098                       | 6.295            | 0.109                       | 5.867            | 0.112                       | 5.837            |
| <i>S. aureus</i><br>ATCC 700698       | 0.273                       | 7.233            | 0.185                       | 8.569            | 0.236                       | 7.717            | 0.285                       | 7.511            | 0.325                       | 7.419            | 0.294                       | 7.246            | 0.288                       | 7.251            | 0.301                       | 7.247            | 0.282                       | 7.203            |
| <i>S. aureus</i><br>ATCC 700699       | 0.273                       | 7.527            | 0.072                       | 7.743            | 0.146                       | 7.396            | 0.193                       | 7.520            | 0.213                       | 7.442            | 0.236                       | 7.394            | 0.253                       | 7.527            | 0.262                       | 7.519            | 0.268                       | 7.488            |
| <i>S. aureus</i><br>OBV 17/104        | 0.160                       | 5.534            | 0.018                       | 15.540           | 0.028                       | 8.262            | 0.084                       | 6.940            | 0.119                       | 6.529            | 0.143                       | 5.961            | 0.148                       | 5.798            | 0.154                       | 5.614            | 0.160                       | 5.637            |
| <i>S. epidermidis</i><br>DSM 28319    | 0.114                       | 5.973            | 0.000                       | -                | 0.037                       | 15.697           | 0.038                       | 5.928            | 0.086                       | 6.613            | 0.098                       | 5.925            | 0.105                       | 5.906            | 0.101                       | 5.862            | 0.120                       | 6.105            |
| <i>S. epidermidis</i><br>DSM 3269     | 0.228                       | 6.008            | 0.031                       | 5.477            | 0.084                       | 4.933            | 0.178                       | 5.891            | 0.209                       | 5.962            | 0.230                       | 5.971            | 0.233                       | 5.988            | 0.243                       | 6.028            | 0.229                       | 6.005            |
| <i>S. epidermidis</i><br>ATCC 12228   | 0.159                       | 6.047            | 0.014                       | 6.655            | 0.062                       | 4.874            | 0.120                       | 5.522            | 0.135                       | 5.687            | 0.149                       | 5.736            | 0.156                       | 5.981            | 0.157                       | 6.026            | 0.160                       | 6.025            |
| <i>S. epidermidis</i><br>OBV 14/175-2 | 0.156                       | 4.720            | 0.046                       | 4.904            | 0.102                       | 4.935            | 0.118                       | 4.729            | 0.132                       | 4.750            | 0.150                       | 4.903            | 0.141                       | 4.726            | 0.157                       | 4.823            | 0.171                       | 4.914            |
| <i>S. epidermidis</i><br>OBV 14/175-3 | 0.098                       | 4.148            | 0.037                       | 4.752            | 0.064                       | 3.636            | 0.078                       | 3.892            | 0.094                       | 4.094            | 0.097                       | 4.218            | 0.099                       | 4.336            | 0.097                       | 4.324            | 0.097                       | 4.350            |
| <i>S. epidermidis</i><br>OBV 12/122   | 0.119                       | 4.610            | 0.040                       | 5.899            | 0.079                       | 5.120            | 0.091                       | 4.846            | 0.096                       | 4.687            | 0.115                       | 4.815            | 0.113                       | 4.777            | 0.113                       | 4.665            | 0.117                       | 4.738            |

|                                     |       |       |       |        |       |        |       |       |       |       |       |       |       |       |       |       |       |       |
|-------------------------------------|-------|-------|-------|--------|-------|--------|-------|-------|-------|-------|-------|-------|-------|-------|-------|-------|-------|-------|
| <i>S. lugdunensis</i><br>OBV 20/143 | 0.064 | 2.929 | 0.022 | 21.527 | 0.084 | 12.426 | 0.031 | 5.077 | 0.043 | 3.828 | 0.059 | 3.612 | 0.062 | 3.258 | 0.062 | 3.218 | 0.066 | 3.196 |
| <i>P. aeruginosa</i><br>DSM 21385   | 0.100 | 4.519 | 0.000 | -      | 0.028 | 4.310  | 0.069 | 4.539 | 0.089 | 4.630 | 0.097 | 4.532 | 0.099 | 4.640 | 0.101 | 4.572 | 0.102 | 4.593 |
| <i>P. aeruginosa</i><br>OBV 19/662  | 0.131 | 4.656 | 0.000 | -      | 0.090 | 6.641  | 0.121 | 5.376 | 0.127 | 5.050 | 0.131 | 4.854 | 0.136 | 4.866 | 0.135 | 4.816 | 0.139 | 4.813 |
| <i>E. faecalis</i><br>ATCC 29212    | 0.198 | 2.828 | 0.055 | 3.570  | 0.125 | 3.179  | 0.168 | 3.152 | 0.194 | 3.153 | 0.201 | 3.091 | 0.202 | 2.983 | 0.197 | 2.816 | 0.197 | 2.854 |
| <i>E. faecalis</i><br>OBV 11/850    | 0.175 | 2.519 | 0.042 | 3.101  | 0.133 | 2.886  | 0.175 | 2.788 | 0.174 | 2.624 | 0.179 | 2.596 | 0.178 | 2.571 | 0.181 | 2.576 | 0.183 | 2.547 |
| <i>E. faecium</i><br>OBV 11/549-b   | 0.142 | 3.886 | 0.024 | 5.193  | 0.093 | 4.516  | 0.139 | 4.320 | 0.151 | 4.193 | 0.155 | 4.109 | 0.154 | 4.040 | 0.150 | 3.980 | 0.151 | 3.989 |
| <i>E. coli</i><br>ATCC 25922        | 0.109 | 1.847 | 0.078 | 3.693  | 0.127 | 2.703  | 0.141 | 2.548 | 0.152 | 2.488 | 0.112 | 1.915 | 0.140 | 2.320 | 0.134 | 2.236 | 0.138 | 2.257 |
| <i>E. coli</i><br>DSM 613           | 0.202 | 2.757 | 0.104 | 5.682  | 0.131 | 3.113  | 0.158 | 2.952 | 0.175 | 2.859 | 0.175 | 2.731 | 0.216 | 2.854 | 0.175 | 2.670 | 0.206 | 2.800 |
| <i>E. coli</i><br>OBV 14/112        | 0.113 | 1.479 | 0.079 | 3.795  | 0.110 | 2.421  | 0.123 | 2.074 | 0.114 | 1.723 | 0.113 | 1.582 | 0.129 | 1.750 | 0.114 | 1.537 | 0.123 | 1.579 |
| <i>E. coli</i><br>OBV 12/344        | 0.141 | 2.013 | 0.058 | 3.517  | 0.089 | 2.251  | 0.108 | 2.017 | 0.133 | 2.141 | 0.144 | 2.135 | 0.141 | 2.097 | 0.114 | 1.537 | 0.131 | 1.906 |
